# Supplementary material for: The Smc5/Smc6/MAGE Complex Confers Resistance to Caffeine and Genotoxic Stress in Drosophila melanogaster
Source: PubMed Central journal article supplement (PMC3610895; doi:10.1371/journal.pone.0059866), 2013-03-28
Supplement: pone.0059866.s006.pdf [file pone.0059866.s006.pdf]

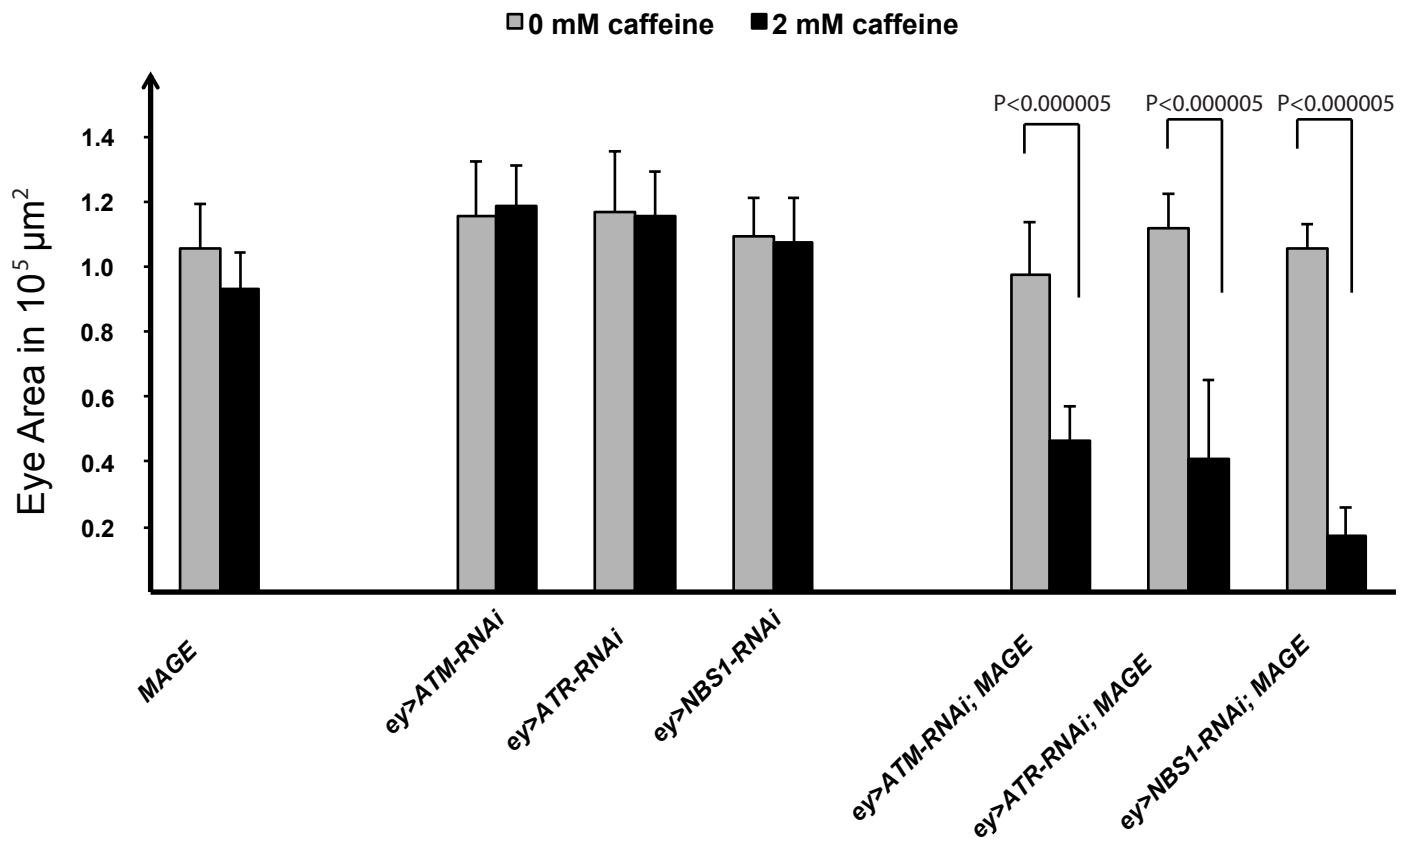

Fig. S6
