# Supplementary material for: The Smc5/Smc6/MAGE Complex Confers Resistance to Caffeine and Genotoxic Stress in Drosophila melanogaster
Source: PubMed Central journal article supplement (PMC3610895; doi:10.1371/journal.pone.0059866), 2013-03-28
Supplement: pone.0059866.s009.pdf [file pone.0059866.s009.pdf]

**Table S1. *sst* caffeine sensitivity can be rescued by a *MAGE* transgene.**

| Genotype                                             | 0 mM caffeine | 2 mM caffeine |
|------------------------------------------------------|---------------|---------------|
| <i>3Kb+MAGE/+;sst<sup>XL</sup>/sst<sup>XL</sup></i>  | 64            | 118           |
| <i>3Kb+MAGE/+; sst<sup>XL</sup>/TM3, Ser, ActGFP</i> | 59            | 77            |
| <i>CyO/+; sst<sup>XL</sup>/sst<sup>XL</sup></i>      | 52            | 0             |
| <i>CyO/+; sst<sup>XL</sup>/TM3, Ser, ActGFP</i>      | 77            | 30            |

All genotypes were produced from cross *sst<sup>XL</sup>/sst<sup>XL</sup>* X *3Kb+dMAGE/CyO;sst<sup>XL</sup>/TM3, Ser, ActGFP*.
