# Supplementary material for: The Smc5/Smc6/MAGE Complex Confers Resistance to Caffeine and Genotoxic Stress in Drosophila melanogaster
Source: PubMed Central journal article supplement (PMC3610895; doi:10.1371/journal.pone.0059866), 2013-03-28
Supplement: pone.0059866.s010.pdf [file pone.0059866.s010.pdf]

**Table S2. P-element excision of *P{GSV1}GS3245* and *P{GSV6}GS14577* produce both caffeine-sensitive and -insensitive lines.**

Suppl. Table 2 A

| Excision alleles | Caffeine sensitive? | <i>Smc5<sup>P14577</sup>/Smc5<sup>P14577</sup> X Smc5<sup>exP14577</sup>/TM3,Sb</i>             |                                             |                                                      |                                             | <i>Smc5<sup>exP14577</sup>/Smc5<sup>exP14577</sup> X Smc5<sup>Df(3L)BSC418</sup>/TM6,Sb</i> |                                       |                                                            |                                       |
|------------------|---------------------|-------------------------------------------------------------------------------------------------|---------------------------------------------|------------------------------------------------------|---------------------------------------------|---------------------------------------------------------------------------------------------|---------------------------------------|------------------------------------------------------------|---------------------------------------|
|                  |                     | Standard media                                                                                  |                                             | Caffeine 1mM                                         |                                             | Standard media                                                                              |                                       | Caffeine 1mM                                               |                                       |
|                  |                     | <i>Smc5<sup>exP14577</sup>/Smc5<sup>P14577</sup></i>                                            | <i>Smc5<sup>P14577</sup>/TM3,Sb</i>         | <i>Smc5<sup>exP14577</sup>/Smc5<sup>P14577</sup></i> | <i>Smc5<sup>P14577</sup>/TM3,Sb</i>         | <i>Smc5<sup>exP14577</sup>/Smc5<sup>Df(3L)BSC418</sup></i>                                  | <i>Smc5<sup>exP14577</sup>/TM6,Sb</i> | <i>Smc5<sup>exP14577</sup>/Smc5<sup>Df(3L)BSC418</sup></i> | <i>Smc5<sup>exP14577</sup>/TM6,Sb</i> |
| 1                | No                  | 50                                                                                              | 56                                          | 18                                                   | 27                                          | 61                                                                                          | 97                                    | 51                                                         | 57                                    |
| 2                | No                  | 28                                                                                              | 33                                          | 14                                                   | 18                                          | 60                                                                                          | 81                                    | 30                                                         | 47                                    |
| 3                | Yes                 | 58                                                                                              | 79                                          | 0                                                    | 16                                          | 51                                                                                          | 30                                    | 0                                                          | 11                                    |
| 4                | No                  | 62                                                                                              | 101                                         | 19                                                   | 35                                          | 30                                                                                          | 33                                    | 29                                                         | 36                                    |
| 5                | Yes                 | N/A                                                                                             | N/A                                         | N/A                                                  | N/A                                         | 42                                                                                          | 56                                    | 0                                                          | 12                                    |
| 7                | Yes                 | 52                                                                                              | 77                                          | 0                                                    | 22                                          | 39                                                                                          | 40                                    | 0                                                          | 8                                     |
| 9                | Yes                 | 24                                                                                              | 19                                          | N/A                                                  | N/A                                         | 41                                                                                          | 56                                    | 1                                                          | 24                                    |
| 10               | Yes                 | 29                                                                                              | 40                                          | 0                                                    | 2                                           | 45                                                                                          | 47                                    | 0                                                          | 16                                    |
| 11               | Yes                 | 57                                                                                              | 53                                          | 0                                                    | 43                                          | 38                                                                                          | 47                                    | 1                                                          | 24                                    |
| 12               | No                  | 17                                                                                              | 30                                          | 15                                                   | 13                                          | 63                                                                                          | 77                                    | 26                                                         | 39                                    |
| 13               | No                  | 54                                                                                              | 90                                          | 28                                                   | 35                                          | 33                                                                                          | 43                                    | 14                                                         | 35                                    |
| 14               | Yes                 | 54                                                                                              | 61                                          | 0                                                    | 21                                          | 29                                                                                          | 32                                    | 0                                                          | 33                                    |
| 15               | Yes                 | 52                                                                                              | 74                                          | 0                                                    | 20                                          | 82                                                                                          | 84                                    | 11                                                         | 27                                    |
| Original Allele  |                     | <i>Smc5<sup>P14577</sup>/Smc5<sup>P14577</sup> X Smc5<sup>exP14577</sup>/TM3,TM3,Ser,ActGFP</i> |                                             |                                                      |                                             | <i>Smc5<sup>exP14577</sup>/Smc5<sup>exP14577</sup> X Smc5<sup>Df(3L)BSC418</sup>/TM6,Sb</i> |                                       |                                                            |                                       |
|                  |                     | <i>Smc5<sup>P14577</sup>/Smc5<sup>P14577</sup></i>                                              | <i>Smc5<sup>P14577</sup>/TM3,Ser,ActGFP</i> | <i>Smc5<sup>exP14577</sup>/Smc5<sup>P14577</sup></i> | <i>Smc5<sup>P14577</sup>/TM3,Ser,ActGFP</i> | <i>Smc5<sup>exP14577</sup>/Smc5<sup>Df(3L)BSC418</sup></i>                                  | <i>Smc5<sup>P14577</sup>/TM6,Sb</i>   | <i>Smc5<sup>exP14577</sup>/Smc5<sup>Df(3L)BSC418</sup></i> | <i>Smc5<sup>P14577</sup>/TM6,Sb</i>   |
|                  | Yes                 | 58                                                                                              | 77                                          | 0                                                    | 33                                          | 44                                                                                          | 56                                    | 0                                                          | 7                                     |

Suppl. Table 2 B

| Excision alleles | Caffeine sensitive? | <i>Smc5<sup>P3245</sup>/Smc5<sup>P3245</sup> X Smc5<sup>exP3245</sup>/TM3,Sb</i> |                                    |                                                    |                                    | <i>Smc5<sup>exP3245</sup>/TM3,Sb X Smc5<sup>Df(3L)BSC418</sup>/TM6,Sb</i> |                                                             |                                                           |                                                             |
|------------------|---------------------|----------------------------------------------------------------------------------|------------------------------------|----------------------------------------------------|------------------------------------|---------------------------------------------------------------------------|-------------------------------------------------------------|-----------------------------------------------------------|-------------------------------------------------------------|
|                  |                     | Standard media                                                                   |                                    | Caffeine 1mM                                       |                                    | Standard media                                                            |                                                             | Caffeine 1mM                                              |                                                             |
|                  |                     | <i>Smc5<sup>exP3245</sup>/Smc5<sup>P3245</sup></i>                               | <i>Smc5<sup>P3245</sup>/TM3,Sb</i> | <i>Smc5<sup>exP3245</sup>/Smc5<sup>P3245</sup></i> | <i>Smc5<sup>P3245</sup>/TM3,Sb</i> | <i>Smc5<sup>exP3245</sup>/Smc5<sup>Df(3L)BSC418</sup></i>                 | <i>Smc5<sup>exP3245</sup> or Df(3L)BSC418/TM6 or TM3,Sb</i> | <i>Smc5<sup>exP3245</sup>/Smc5<sup>Df(3L)BSC418</sup></i> | <i>Smc5<sup>exP3245</sup> or Df(3L)BSC418/TM6 or TM3,Sb</i> |
| 1                | No                  | 10                                                                               | 32                                 | 13                                                 | 34                                 | 46                                                                        | 82                                                          | 27                                                        | 45                                                          |
| 2                | No                  | 15                                                                               | 72                                 | 17                                                 | 41                                 | 57                                                                        | 119                                                         | 22                                                        | 45                                                          |

|                  |     |                                                                                            |                                            |                                                  |                                            |                                                                         |                                                           |                                                         |                                                           |
|------------------|-----|--------------------------------------------------------------------------------------------|--------------------------------------------|--------------------------------------------------|--------------------------------------------|-------------------------------------------------------------------------|-----------------------------------------------------------|---------------------------------------------------------|-----------------------------------------------------------|
| 3                | No  | 19                                                                                         | 53                                         | 6                                                | 46                                         | N/A                                                                     | N/A                                                       | N/A                                                     | N/A                                                       |
| 4                | No  | 39                                                                                         | 115                                        | 6                                                | 39                                         | 29                                                                      | 64                                                        | 12                                                      | 44                                                        |
| 5                | No  | 37                                                                                         | 128                                        | 17                                               | 49                                         | 30                                                                      | 117                                                       | 15                                                      | 48                                                        |
| 6                | No  | 50                                                                                         | 108                                        | 25                                               | 40                                         | 56                                                                      | 109                                                       | 18                                                      | 28                                                        |
| 7                | No  | 20                                                                                         | 72                                         | 31                                               | 52                                         | 43                                                                      | 64                                                        | 24                                                      | 28                                                        |
| 8                | No  | 34                                                                                         | 106                                        | 0                                                | 69                                         | 37                                                                      | 95                                                        | 0                                                       | 34                                                        |
| 9                | Yes | 27                                                                                         | 155                                        | 0                                                | 73                                         | 55                                                                      | 116                                                       | 0                                                       | 36                                                        |
| 10               | Yes | 44                                                                                         | 105                                        | 26                                               | 30                                         | 57                                                                      | 87                                                        | 16                                                      | 50                                                        |
| 11               | No  | 42                                                                                         | 127                                        | 22                                               | 56                                         | 35                                                                      | 147                                                       | 10                                                      | 39                                                        |
| 12               | Yes | 20                                                                                         | 77                                         | 0                                                | 51                                         | 30                                                                      | 110                                                       | 0                                                       | 30                                                        |
| 13               | Yes | 34                                                                                         | 84                                         | 0                                                | 48                                         | 11                                                                      | 33                                                        | 0                                                       | 33                                                        |
| Original Alleles |     | <i>Smc5<sup>P3245</sup>/Smc5<sup>P3245</sup> X Smc5<sup>P3245</sup>/TM3,TM3,Ser,ActGFP</i> |                                            |                                                  |                                            | <i>Smc5<sup>P3245</sup>/TM3,Sb X Smc5<sup>Df(3L)BSC418</sup>/TM6,Sb</i> |                                                           |                                                         |                                                           |
|                  |     | <i>Smc5<sup>P3245</sup>/Smc5<sup>P3245</sup></i>                                           | <i>Smc5<sup>P3245</sup>/TM3,Ser,ActGFP</i> | <i>Smc5<sup>P3245</sup>/Smc5<sup>P3245</sup></i> | <i>Smc5<sup>P3245</sup>/TM3,Ser,ActGFP</i> | <i>Smc5<sup>P3245</sup>/Smc5<sup>Df(3L)BSC418</sup></i>                 | <i>Smc5<sup>P3245</sup> or Df(3L)BSC418/TM6 or TM3,Sb</i> | <i>Smc5<sup>P3245</sup>/Smc5<sup>Df(3L)BSC418</sup></i> | <i>Smc5<sup>P3245</sup> or Df(3L)BSC418/TM6 or TM3,Sb</i> |
|                  | Yes | 30                                                                                         | 71                                         | 0                                                | 52                                         | 39                                                                      | 96                                                        | 0                                                       | 46                                                        |
