# Supplementary material for: The Smc5/Smc6/MAGE Complex Confers Resistance to Caffeine and Genotoxic Stress in Drosophila melanogaster
Source: PubMed Central journal article supplement (PMC3610895; doi:10.1371/journal.pone.0059866), 2013-03-28
Supplement: pone.0059866.s011.pdf [file pone.0059866.s011.pdf]

**Table S3. Caffeine sensitivity of *MAGE* and *Smc6* double mutants is similar to sensitivity of flies mutant for *Smc6* alone.**

| Cross | Genotype                                                                     | Mutant status | No caffeine | Caffeine | Sensitivity ratio |
|-------|------------------------------------------------------------------------------|---------------|-------------|----------|-------------------|
| 1     | <i>sst<sup>XL</sup>, jnj<sup>XL</sup>/sst<sup>XL</sup>, jnj<sup>RI</sup></i> | Double Mutant | 104         | 9        | 0.07              |
|       | <i>sst<sup>XL</sup>, jnj<sup>RI or XL</sup>/TM3,Ser,ActGFP</i>               | Double Het    | 226         | 267      |                   |
| 2     | <i>+, jnj<sup>XL</sup>/sst<sup>XL</sup>, jnj<sup>RI</sup></i>                | Smc6 Mutant   | 224         | 8        | 0.05              |
|       | <i>+, jnj<sup>XL</sup>/TM3,Ser,ActGFP</i>                                    | Smc6 Het      | 238         | 189      |                   |
| 3     | <i>sst<sup>XL</sup>, +/sst<sup>XL</sup>, jnj<sup>RI</sup></i>                | MAGE Mutant   | 279         | 83       | 0.34              |
|       | <i>sst<sup>XL</sup>, +/TM3,Ser,ActGFP</i>                                    | MAGE Het      | 310         | 274      |                   |

Caffeine sensitivity of *MAGE* and *Smc6* double mutants or single mutants was tested using media with 0.25 mM caffeine. A Sensitivity ratio was calculated by dividing the ratio of the homozygous versus the heterozygous flies surviving on media containing caffeine by the ratio of homozygous to heterozygous flies surviving on standard media. A Sensitivity ratio of 1 indicates that caffeine has no effect. Double Mutant: both *sst/MAGE* and *jnj/Smc6* inactivated; Double Het: *MAGE* and *Smc6* heterozygous mutant; Smc6 Mutant: *Smc6* inactivated; MAGE Mutant: *MAGE* inactivated; Het: heterozygous for either *MAGE* or *Smc6*.
