# Supplementary material for: The Smc5/Smc6/MAGE Complex Confers Resistance to Caffeine and Genotoxic Stress in Drosophila melanogaster
Source: PubMed Central journal article supplement (PMC3610895; doi:10.1371/journal.pone.0059866), 2013-03-28
Supplement: pone.0059866.s012.pdf [file pone.0059866.s012.pdf]

**Table S4. Genes encoding Smc5/6 complexes in different model organisms.**

| component | <i>Drosophila</i> CG | <i>Drosophila</i> symbol in FlyBase    | <i>Schizosaccharomyces pombe</i> gene | <i>Saccharomyces cerevisiae</i> gene | Human gene                                                                                               |
|-----------|----------------------|----------------------------------------|---------------------------------------|--------------------------------------|----------------------------------------------------------------------------------------------------------|
| Smc5      | CG32438              | Dmel\ <i>Smc5</i>                      | Spr18                                 | YOL034W/SMC5                         | SMC5L1<br>(alias KIAA0594, SMC5L1)                                                                       |
| Smc6      | CG5524               | Dmel\ <i>CG5524</i>                    | Rad18                                 | YLR383W/SMC6<br>Rhc18                | SMC6L1<br>(alias FLJ22116, FLJ35534, SMC-6, SMC6L1, hSMC6)                                               |
| Nse1      | CG11329              | Dmel\ <i>CG11329</i>                   | NSE1                                  | YLR007W/NSE1                         | NSMCE1<br>(alias HSPC333, NSE1)                                                                          |
| Nse2      | CG13732<br>CG15645   | *Dmel\ <i>qjt</i><br>Dmel\ <i>cerv</i> | NSE2                                  | YEL019C/MMS21                        | NSMCE2<br>(alias C8orf36, FLJ32440, MMS21, NSE2)                                                         |
| Nse3      | CG10059              | Dmel\ <i>MAGE</i><br>(alias dMAGE)     |                                       | YDR288W/NSE3                         | All MAGE genes<br>NDNL2<br>(alias HCA4, MAGEG1, MAGEL3, NSE3, NSMCE3)                                    |
| Nse4      | CG13142              | Dmel\ <i>CG13142</i>                   | Rad 62                                | YDL105W/NSE4<br>(alias Qri2)         | NSMCE4A<br>(alias NSE4APP4762, C10orf86, FLJ20003, NSE4A)<br><br>NSMCE4B<br>(alias NSE4B, EID3)/<br>EID1 |

\* used by Chiolo I, Minoda A, Colmenares SU, Polyzos A, Costes SV, Karpen GH. 2011. Double-strand breaks in heterochromatin move outside of a dynamic HP1a domain to complete recombinational repair. Cell 144:732-744.

Nse= Non-SMC (structural maintenance of chromosomes) element 1 protein; SMC= structural maintenance of chromosomes
