# Supplementary material for: The Smc5/Smc6/MAGE Complex Confers Resistance to Caffeine and Genotoxic Stress in Drosophila melanogaster
Source: PubMed Central journal article supplement (PMC3610895; doi:10.1371/journal.pone.0059866), 2013-03-28
Supplement: pone.0059866.s014.pdf [file pone.0059866.s014.pdf]

**Quantitative RT-PCR.** Total RNA was extracted from adult flies using Trizol reagent (Invitrogen). RNA concentration and integrity were determined by a Nanodrop ND-1000 (NanoDrop products, Wilmington, DE) and Agilent 2100 Bioanalyser (Agilent Technologies, Santa Clara, CA), respectively. One  $\mu\text{g}$  of total RNA per reaction was used for double strand cDNA synthesis (Applied Biosystems). Then, 2.5  $\mu\text{l}$  of 1/20 diluted cDNA was used for each qPCR reaction with quantification based on SYBR Green incorporation (Applied Biosystems).
