# Supplementary material for: The Smc5/Smc6/MAGE Complex Confers Resistance to Caffeine and Genotoxic Stress in Drosophila melanogaster
Source: PLOS journal article supplement (doi:10.1371/journal.pone.0059866), 2013-03-28
Supplement: S13 (10.1371/journal.pone.0059866.s013) [file journal.pone.0059866.s013]

**Table S5. *mei-41/ATM* and *jnj/Smc6* double mutants have normal viability.**

|                              | <i>jnj<sup>X1</sup>/jnj<sup>Df(3R)Exel6198</sup></i> | <i>jnj<sup>X1</sup>/TM3,Ser,ActGFP</i> |
|------------------------------|------------------------------------------------------|----------------------------------------|
| <i>mei-41<sup>D3</sup>/Y</i> | 99 <sup>ns</sup>                                     | 79 <sup>ns</sup>                       |
| <i>FM7/Y</i>                 | 22 <sup>***</sup>                                    | 35 <sup>***</sup>                      |
| <i>mei-41<sup>D3</sup>/+</i> | 118 <sup>ns</sup>                                    | 110 (double heterozygotes)             |
| <i>FM7/+</i>                 | 118 <sup>ns</sup>                                    | 105 <sup>ns</sup>                      |

*jnj<sup>X1</sup>* homozygous males were crossed to *mei-41<sup>D3</sup>/FM7; jnj<sup>Df(3R)Exel6198</sup>/TM3,Ser,ActGFP*. The progeny representing the eight possible genotypes were counted. The number of progeny for each genotype was compared with the number of progeny heterozygotes for *mei41* and *Smc6* (*mei41<sup>D3</sup>/+*; *jnj<sup>X1</sup>/TM3,Ser,ActGFP*) using a chi-square test, with equal numbers expected in each category. “ns” indicates the number of progeny was not significantly different from the number of double heterozygotes ( $P > 0.05$ ) while “\*\*\*” indicates the number of progeny was significantly different from the number of double heterozygotes ( $P < 0.001$ ). Fewer *FM7/Y* progeny survived, independent of *jnj* genotype, presumably because of non-balanced mutations on the *FM7* chromosome that reduce viability.
